# Supplementary material
Source: publisher figshare collection journal article supplement (https://acs.figshare.com/ndownloader/files/4054363)
Supplement: Supplementary file 1 [file 4054363]

## **Supporting Information**

### **Title:**

**Effective Functionalization of Disordered Oxide Lattices  
on Iron Particle Surfaces Using Mechanochemical Reactions**

### **Authors:**

Satoshi Motozuka,<sup>†, §, \*</sup> Motohiro Tagaya,<sup>‡</sup> Hiroshi Nishiyama,<sup>‡</sup>  
Masami Nishikawa,<sup>‡</sup> Toshiyuki Ikoma,<sup>§</sup> Tomohiko Yoshioka,<sup>§</sup> Sadaki Samitsu,<sup>||</sup> Junzo Tanaka<sup>§</sup>

### **Affiliations:**

<sup>†</sup> *Department of Mechanical Engineering, Gifu National College of Technology,  
2236-2 Kamimakuwa, Motosu, Gifu 501-0495, Japan*

<sup>‡</sup> *Department of Materials Science and Technology, Nagaoka University of Technology,  
1603-1 Kamitomioka, Nagaoka, Niigata 940-2188, Japan*

<sup>§</sup> *Department of Metallurgy and Ceramics Science, Tokyo Institute of Technology,  
2-12-1 O-okayama, Meguro-ku, Tokyo 152-8550, Japan*

<sup>||</sup> *Polymer Materials Unit, National Institute for Materials Science,  
1-1 Namiki, Tsukuba, Ibaraki, 305-0044, Japan*

\* Corresponding Author:

e-mail: motozuka@gifu-nct.ac.jp    tel: +81-58-320-1379

**Figure S1**

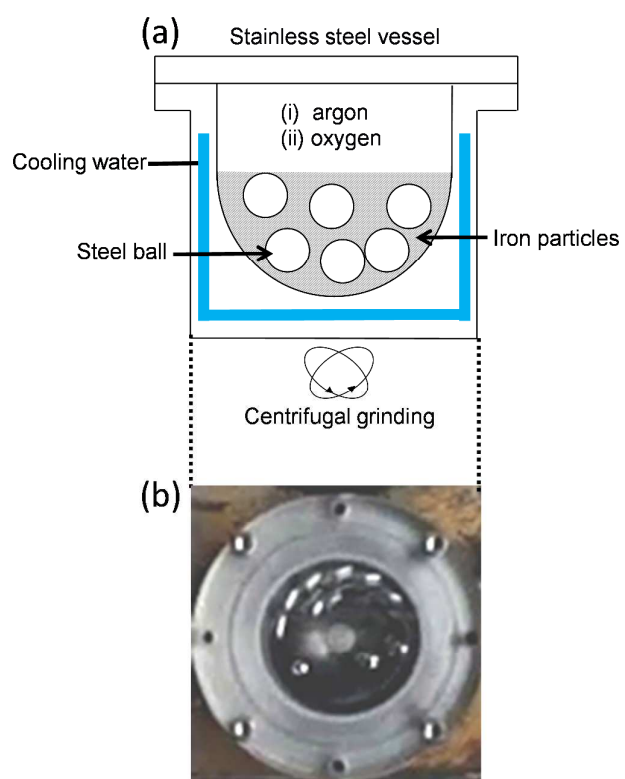

**Figure S1.** (a) Set-up for the mechanochemical reaction, and (b) photograph of the top view of the equipment during the milling.

**Scheme S1**

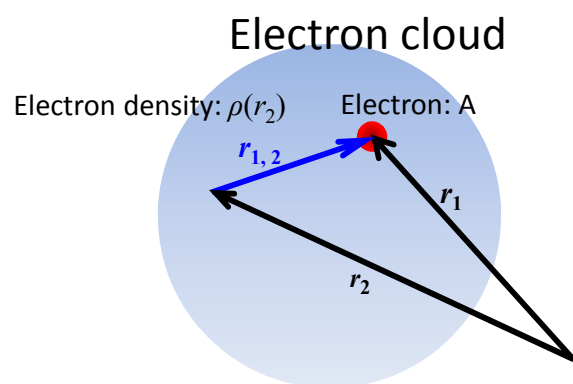

**Scheme S1.** Relationship of the  $r_1$ ,  $r_2$  and  $r_{1,2}$  at equation(8).

### Scheme S2

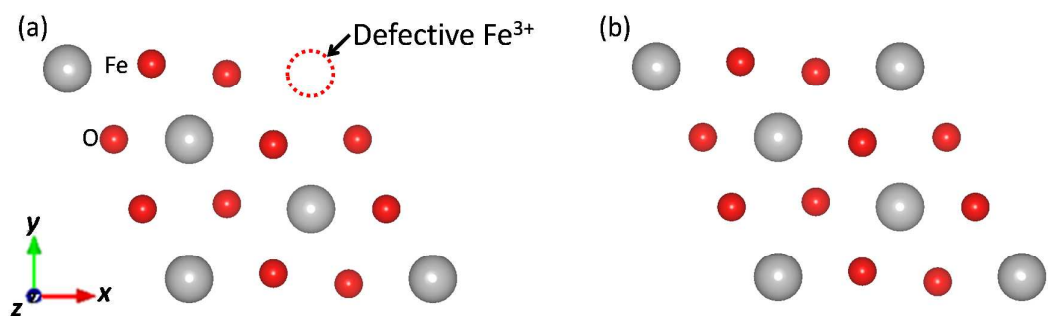

**Scheme S2.** Model clusters by molecular orbital calculations of (a)  $\alpha$ -Fe<sub>2</sub>O<sub>3</sub> surface with the disordered lattice induced by defective Fe<sup>3+</sup> ion, and (b) Fe<sub>2</sub>O<sub>3</sub> crystal with ordered lattice (O atom: red, Fe atom: gray ).

**Figure S2**

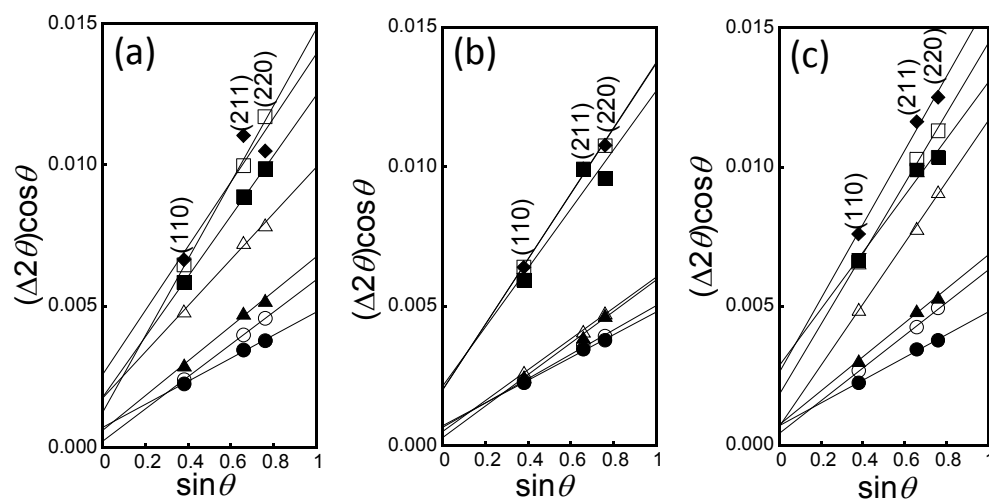

**Figure S2.** Williamson-Hall plots of the iron particles milled by the force of (a) 149 mN, (b) 256 mN and (c) 439 mN at the time of 0 h, 0.5 h, 2 h, 8 h, 16 h, 24 h and 32 h, which are represented by ●, ○, ▲, △, ■, □, ◆, respectively, in the plots, which were calculated from the XRD patterns of the Figure 2 in the text.

**Figure S3**

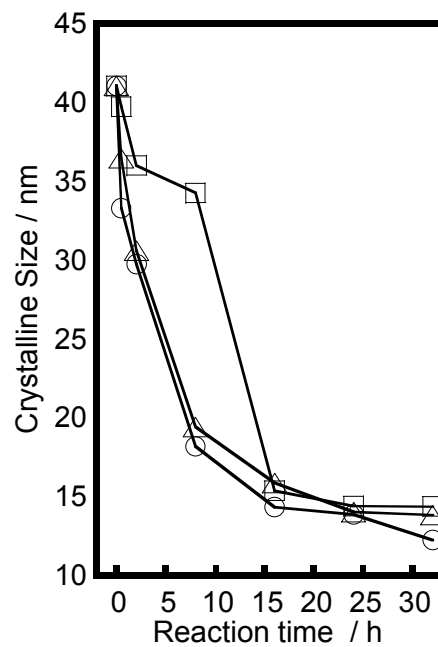

**Figure S3.** Crystallite sizes with the reaction time by the different milling forces of (○) 153 mN, (□) 283 mN and (△) 439 mN, which are calculated by the Scherer's equation.

**Figure S4**

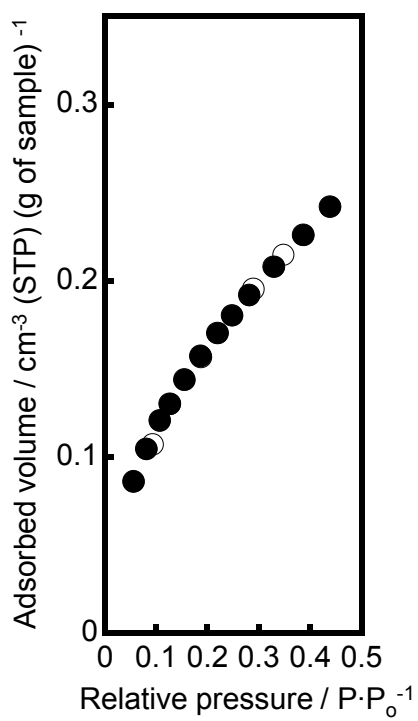

**Figure S4.** Krypton adsorption (closed circles) and desorption (open circles) isotherms of the bare ion particles before the milling.

**Figure S5**

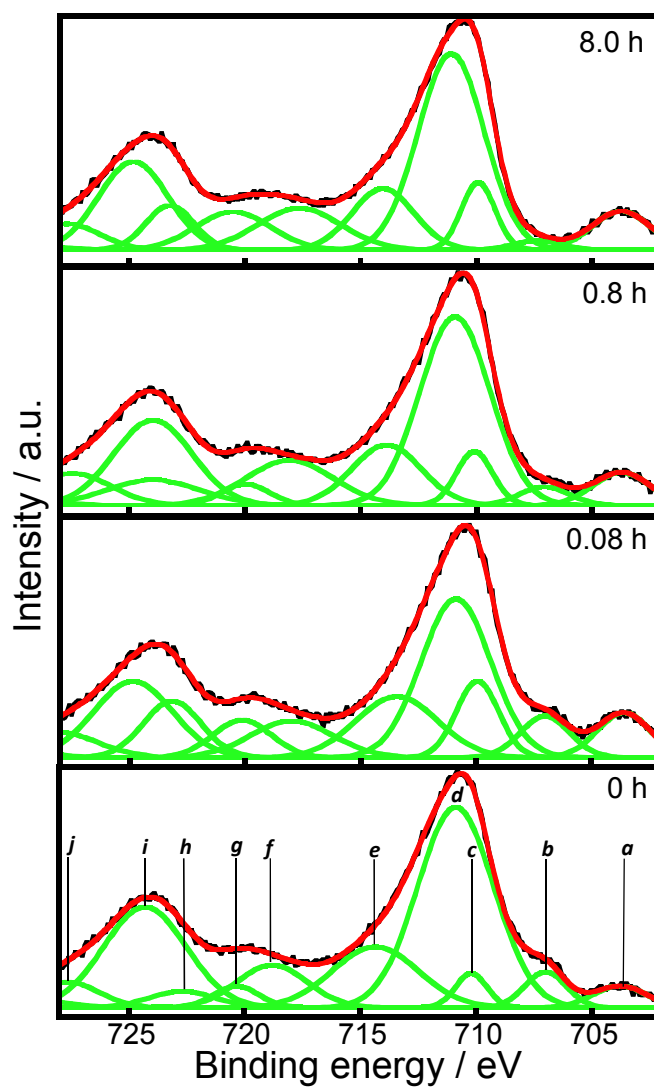

**Figure S5.** Deconvolution results of XPS spectra from Fe 2*p* of the milled iron particles reacted with oxygen molecules at the different time, which were adequately separated into ten peaks (*a*: In 3*p*<sub>1/2</sub>, *b*: Fe<sup>0</sup> 2*p*<sub>3/2</sub>, *c*: Fe<sup>2+</sup> 2*p*<sub>3/2</sub> (Fe<sub>3</sub>O<sub>4</sub>), *d*: Fe<sup>3+</sup> 2*p*<sub>3/2</sub> (a-Fe<sub>2</sub>O<sub>3</sub>), *e*: Sat. Fe<sup>2+</sup> 2*p*<sub>3/2</sub> (Fe<sub>3</sub>O<sub>4</sub>), *f*: Sat. Fe<sup>3+</sup> 2*p*<sub>3/2</sub> (a-Fe<sub>2</sub>O<sub>3</sub>), *g*: Fe<sup>0</sup> 2*p*<sub>1/2</sub>, *h*: Fe<sup>2+</sup> 2*p*<sub>1/2</sub> (Fe<sub>3</sub>O<sub>4</sub>), *i*: Fe<sup>3+</sup> 2*p*<sub>1/2</sub> (a-Fe<sub>2</sub>O<sub>3</sub>), *j*: Sat. Fe<sup>2+</sup> 2*p*<sub>1/2</sub> (Fe<sub>3</sub>O<sub>4</sub>)).
